# Supplementary material
Source: ML conference proceedings conference paper supplement (https://proceedings.neurips.cc/paper_files/paper/2023/hash/767c1b5f7c03d9299e493bc9e1feeba6-Abstract.html)
Supplement: Supplementary file 1 [file 767c1b5f7c03d9299e493bc9e1feeba6-Supplemental-Conference.pdf]

## Supplemental Materials

### A Single-scale datasets

Although PyNeRF is designed for scenarios that capture scene content at different distances, we also evaluate it on the original Synthetic-NeRF [19] dataset where the camera distance remains constant. In this scenario, PyNeRF performs similarly to existing SOTA, as shown in Table 6.

Table 6: **Single-scale results.** We evaluate PyNeRF on single-scale Blender [19]. PyNeRF performs comparably to existing state-of-the-art.

| PSNR          | Lego         | Mic          | Materials    | Chair        | Hotdog       | Ficus        | Drums        | Ship         | Mean         |
|---------------|--------------|--------------|--------------|--------------|--------------|--------------|--------------|--------------|--------------|
| K-Planes [9]  | 35.38        | 33.27        | 29.57        | 33.88        | 36.19        | 30.81        | 25.62        | 30.16        | 31.86        |
| TensorRF [6]  | 35.14        | 25.70        | <b>33.69</b> | <b>37.03</b> | 36.04        | 29.77        | 24.64        | 30.12        | 31.52        |
| iNGP [20]     | <u>35.67</u> | <b>36.85</b> | 29.60        | 35.71        | <u>37.37</u> | <u>33.95</u> | 25.44        | 30.29        | <u>33.11</u> |
| Nerfacto [28] | 34.84        | 33.58        | 26.50        | 34.48        | 37.07        | 30.66        | 23.63        | <b>30.95</b> | 31.46        |
| PyNeRF        | <b>36.63</b> | <u>36.39</u> | <u>29.92</u> | <u>35.76</u> | <b>37.64</b> | <b>34.29</b> | <b>25.80</b> | <u>30.64</u> | <b>33.38</b> |

### B Additional results

We list results for each individual downsampling level in Table 7 and Table 8 to supplement those shown in Table 1 and Table 2.

Table 7: **Synthetic results.** We average results across Multiscale Blender [2] and Blender-A and list metrics for each downsampling level. All PyNeRF variants outperform their baselines by a wide margin.

|                 | ↑PSNR        |              |              |              | ↑SSIM        |              |              |              | ↓LPIPS       |              |              |              | ↓Avg Error   |
|-----------------|--------------|--------------|--------------|--------------|--------------|--------------|--------------|--------------|--------------|--------------|--------------|--------------|--------------|
|                 | Full Res.    | 1/2 Res.     | 1/4 Res.     | 1/8 Res.     | Full Res.    | 1/2 Res.     | 1/4 Res.     | 1/8 Res.     | Full Res.    | 1/2 Res.     | 1/4 Res.     | 1/8 Res.     |              |
| Plenoxels [25]  | 22.61        | 23.68        | 24.54        | 23.62        | 0.767        | 0.768        | 0.784        | 0.789        | 0.307        | 0.265        | 0.200        | 0.161        | 0.102        |
| K-Planes [9]    | 25.14        | 27.03        | 30.26        | 30.75        | 0.807        | 0.840        | 0.896        | 0.925        | 0.225        | 0.163        | 0.085        | 0.053        | 0.046        |
| TensorRF [6]    | 25.93        | 28.12        | 31.46        | 30.97        | 0.865        | 0.893        | 0.921        | 0.930        | 0.169        | 0.112        | 0.064        | 0.056        | 0.042        |
| iNGP [20]       | 26.90        | 29.14        | 30.89        | 28.49        | 0.865        | 0.905        | 0.947        | 0.947        | 0.152        | 0.095        | 0.047        | 0.054        | 0.032        |
| Nerfacto [28]   | 25.35        | 27.26        | 29.78        | 29.09        | 0.809        | 0.840        | 0.893        | 0.917        | 0.214        | 0.158        | 0.094        | 0.068        | 0.049        |
| Mip-NeRF [2]    | 32.07        | 33.65        | 34.76        | 35.00        | 0.952        | 0.959        | 0.961        | 0.960        | 0.048        | 0.036        | 0.028        | 0.021        | 0.020        |
| PyNeRF          | <b>33.18</b> | <b>35.83</b> | <b>37.59</b> | <b>38.29</b> | <b>0.964</b> | <b>0.977</b> | <b>0.984</b> | <b>0.989</b> | <b>0.030</b> | <b>0.013</b> | <b>0.007</b> | <b>0.004</b> | <b>0.008</b> |
| PyNeRF-K-Planes | <u>33.12</u> | 35.18        | 36.45        | 36.94        | <u>0.963</u> | 0.973        | 0.980        | 0.985        | <b>0.028</b> | <u>0.014</u> | 0.009        | <u>0.005</u> | <b>0.008</b> |
| PyNeRF-TensorRF | 32.94        | <u>35.34</u> | <u>36.92</u> | <u>37.46</u> | 0.959        | <u>0.974</u> | <u>0.982</u> | <u>0.987</u> | 0.033        | <u>0.014</u> | <u>0.008</u> | <u>0.005</u> | <b>0.008</b> |

Table 8: **Real-world results.** We average results across Boat [24] and Mip-NeRF 360 [3]. As in Table 7, all PyNeRF variants improve significantly upon their baselines.

|                          | ↑PSNR        |              |              |              | ↑SSIM        |              |              |              | ↓LPIPS       |              |              |              | ↓Avg Error   |
|--------------------------|--------------|--------------|--------------|--------------|--------------|--------------|--------------|--------------|--------------|--------------|--------------|--------------|--------------|
|                          | Full Res.    | 1/2 Res.     | 1/4 Res.     | 1/8 Res.     | Full Res.    | 1/2 Res.     | 1/4 Res.     | 1/8 Res.     | Full Res.    | 1/2 Res.     | 1/4 Res.     | 1/8 Res.     |              |
| Plenoxels [25]           | 20.69        | 20.70        | 20.98        | 21.93        | 0.627        | 0.543        | 0.547        | 0.640        | 0.661        | 0.607        | 0.525        | 0.364        | 0.128        |
| K-Planes [9]             | 20.53        | 20.55        | 20.84        | 21.85        | 0.618        | 0.525        | 0.512        | 0.602        | 0.655        | 0.587        | 0.488        | 0.328        | 0.128        |
| TensorRF [6]             | 17.31        | 17.33        | 17.49        | 17.96        | 0.548        | 0.431        | 0.367        | 0.384        | 0.748        | 0.714        | 0.662        | 0.552        | 0.190        |
| iNGP [20]                | 19.53        | 19.83        | 16.06        | 20.86        | 0.598        | 0.504        | 0.489        | 0.574        | 0.670        | 0.610        | 0.517        | 0.351        | 0.146        |
| Nerfacto [28]            | 21.37        | 21.42        | 21.81        | 23.15        | 0.629        | 0.558        | 0.575        | 0.688        | 0.594        | 0.512        | 0.389        | 0.226        | 0.110        |
| Mip-NeRF 360 w/ GLO [3]  | <u>21.73</u> | <u>21.72</u> | <u>22.13</u> | <u>23.65</u> | <b>0.650</b> | <b>0.597</b> | <b>0.628</b> | <b>0.736</b> | <b>0.518</b> | <b>0.427</b> | <b>0.309</b> | <b>0.165</b> | <b>0.100</b> |
| Mip-NeRF 360 w/o GLO [3] | 21.01        | 21.00        | 21.39        | 22.88        | 0.634        | 0.580        | 0.610        | 0.718        | 0.529        | 0.441        | 0.323        | 0.179        | 0.111        |
| Exact-NeRF w/ GLO [14]   | 20.72        | 20.73        | 21.04        | 22.34        | 0.637        | 0.571        | 0.583        | 0.674        | 0.559        | 0.478        | 0.378        | 0.237        | 0.121        |
| Exact-NeRF w/o GLO [14]  | 20.98        | 20.97        | 21.34        | 22.80        | 0.635        | 0.578        | 0.604        | 0.710        | 0.548        | 0.451        | 0.339        | 0.192        | 0.113        |
| PyNeRF                   | <b>22.05</b> | <b>22.16</b> | <b>22.56</b> | <b>23.84</b> | <u>0.645</u> | <u>0.591</u> | <u>0.620</u> | <u>0.725</u> | <u>0.535</u> | <u>0.441</u> | <u>0.316</u> | <u>0.184</u> | <b>0.098</b> |
| PyNeRF-K-Planes          | 21.47        | 21.49        | 21.87        | 23.18        | 0.633        | 0.570        | 0.591        | 0.694        | 0.563        | 0.478        | 0.362        | 0.217        | 0.108        |
| PyNeRF-TensorRF          | 20.82        | 20.89        | 21.25        | 22.48        | 0.594        | 0.521        | 0.528        | 0.630        | 0.648        | 0.558        | 0.438        | 0.284        | 0.122        |
